# Supplementary material for: Curcumin Disrupts a Positive Feedback Loop between ADMSCs and Cancer Cells in the Breast Tumor Microenvironment via the CXCL12/CXCR4 Axis
Source: MDPI journal article supplement (doi:10.3390/pharmaceutics15112627), 2023-11-15
Supplement: s1 [file s1]

## Supplementary Materials

### **Curcumin disrupts a positive feedback loop between ADMSCs and cancer cells in the breast tumor microenvironment via the CXCL12/CXCR4 axis**

Table S1. The qRT-PCR primer sets utilized in this study.

Figure S1. Assessment of the optimal time for NF- $\kappa$ B activation in ADMSCs when MCF7-CM was treated.

Figure S2. Measurement of the optimum time for NF- $\kappa$ B inhibition in MCF7 cells after curcumin treatment.

Figure S3. Determining the appropriate time for NF- $\kappa$ B activation in MCF7 cells following CAF-CM treatment.

Figure S4. The inhibitory effect of curcumin on the CXCL12/CXCR4 axis is independent of its antioxidant properties.

Table S1. The qRT-PCR primer sets utilized in this study.

| Gene                           | Sequence (5' → 3') |                        |
|--------------------------------|--------------------|------------------------|
| <b>GAPDH</b>                   | F                  | TATGACAACAGCCTCAAGAT   |
|                                | R                  | GAGTCCTTCCACGATACC     |
| <b>Vimentin</b>                | F                  | AGGCAAAGCAGGAGTCCACTGA |
|                                | R                  | ATCTGGCGTTCCAGGGACTCAT |
| <b><math>\alpha</math>-SMA</b> | F                  | GCTTGTCAGGGCTTGTCCA    |
|                                | R                  | TTGAAGCGGAAGTCTGGGAA   |
| <b>FN1</b>                     | F                  | ACAACACCGAGGTGACTGAGAC |
|                                | R                  | GGACACAACGATGCTTCCTGAG |
| <b>CXCL12</b>                  | F                  | TGCCCTTCAGATTGTAGCCC   |
|                                | R                  | GCCCTTCCCTAACACTGGTT   |
| <b>CXCR4</b>                   | F                  | CAGATAACTACACCGAGGAA   |
|                                | R                  | TGACCAGGATGACCAATC     |

Figure S1. Assessment of the optimal time for NF- $\kappa$ B activation in ADMSCs when MCF7-CM was treated.

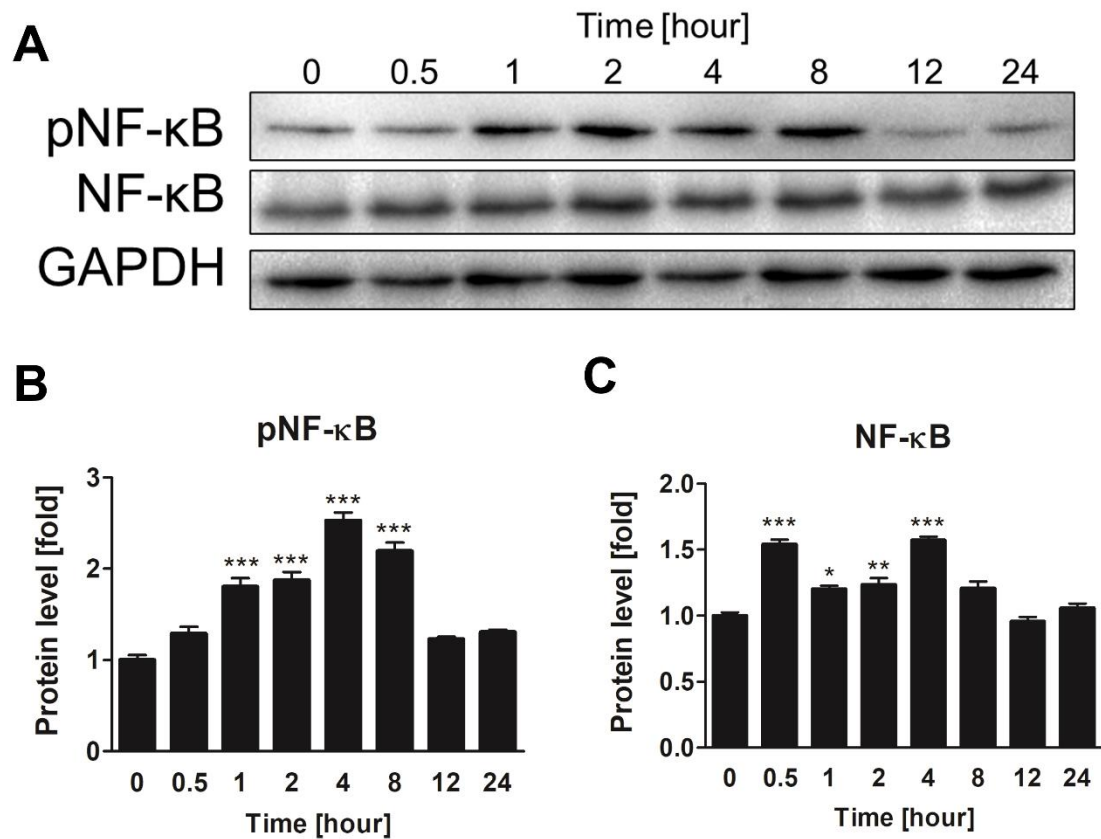

ADMSCs were exposed to 50% of MCF7-CM over a time range of 0-24 h to evaluate protein expressions of pNF- $\kappa$ B and NF- $\kappa$ B, which were subsequently quantified through immunoblot analysis. \*  $p < 0.05$ , \*\*  $p < 0.01$ , and \*\*\*  $p < 0.001$  compared to the 0-hour group.

Figure S2. Measurement of the optimum time for NF- $\kappa$ B inhibition in MCF7 cells after curcumin treatment.

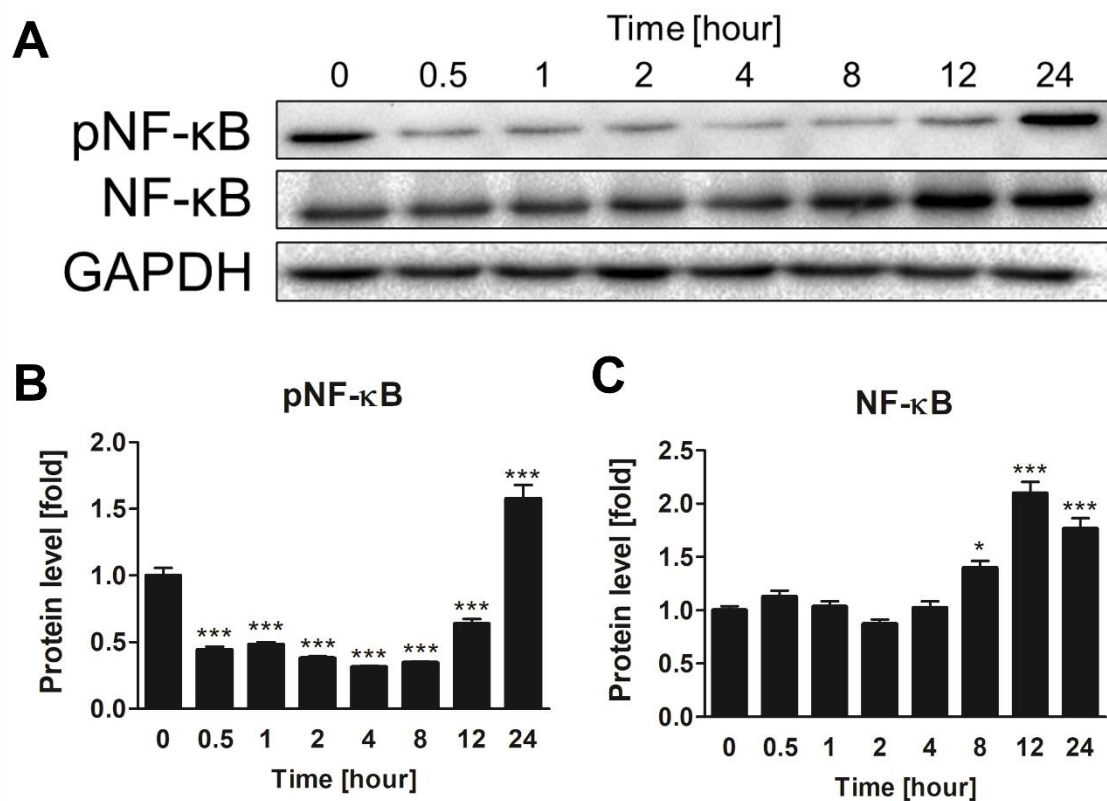

A concentration of 20  $\mu$ M curcumin was treated to MCF7 breast cancer cells over a time ranging from 0 to 24 h. This treatment aimed to assess the protein expressions of pNF- $\kappa$ B and NF- $\kappa$ B. \*  $p < 0.05$  and \*\*\*  $p < 0.001$  compared to the 0-hour group.

Figure S3. Determining the appropriate time for NF- $\kappa$ B activation in MCF7 cells following CAF-CM treatment.

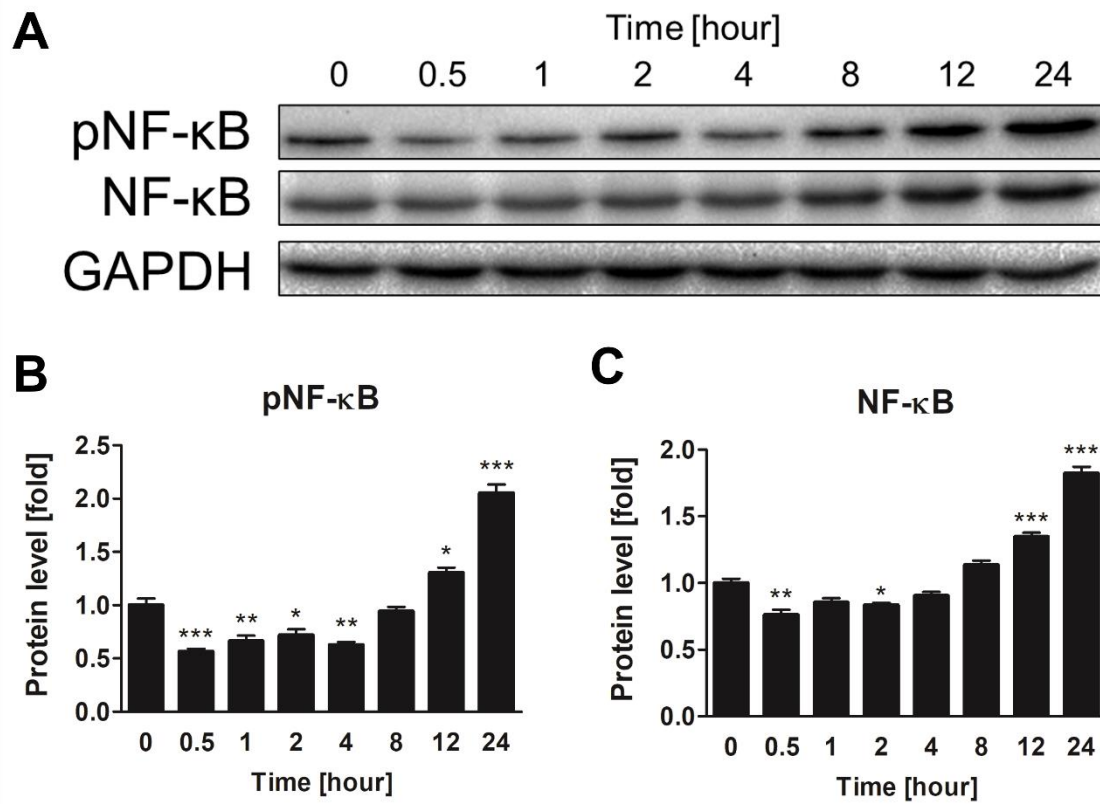

To determine the ideal time point for NF- $\kappa$ B activation in MCF7 cells following CAF-CM treatment, a time-course experiment was conducted. MCF7 cells were exposed to Cur-CM, and samples were collected at various time points ranging from 0 to 24 h. \*  $p < 0.05$ , \*\*  $p < 0.01$ , and \*\*\*  $p < 0.001$  compared to the 0-hour group.

Figure S4. The inhibitory effect of curcumin on the CXCL12/CXCR4 axis is independent of its antioxidant properties.

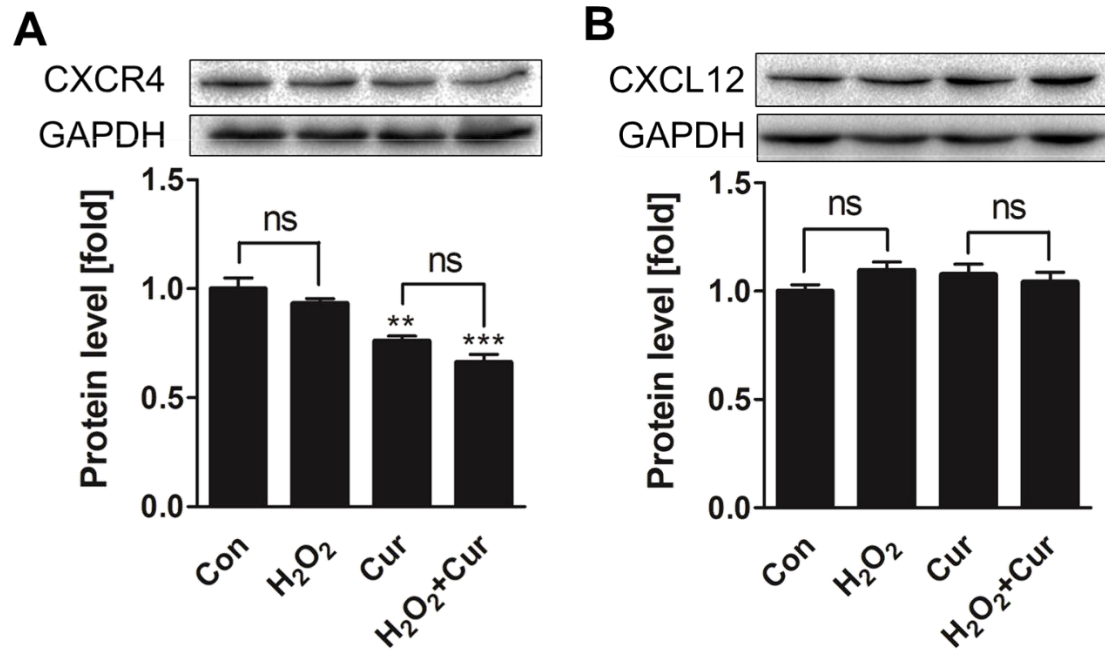

Protein levels of both (A) CXCR4 and (B) CXCL12 were assessed using an immunoblot assay. ADMSCs were seeded at a concentration of  $1 \times 10^5$  cells/mL and subjected to treatment with 100  $\mu$ M of hydrogen peroxide (H<sub>2</sub>O<sub>2</sub>) either alone or in combination with 20  $\mu$ M of curcumin for 24 h. \*\*  $p < 0.01$  and \*\*\*  $p < 0.001$  compared to the control group; Con: control; H<sub>2</sub>O<sub>2</sub>: 100  $\mu$ M of H<sub>2</sub>O<sub>2</sub> treatment group; Cur: 20  $\mu$ M of curcumin treatment group.
